# Supplementary material for: The metabolomic signature of weight loss in the Diabetes Remission Clinical Trial (DiRECT)
Source: bioRxiv or medRxiv preprint supplement (doi:10.1101/2022.07.15.22277671), 2022-07-17
Supplement: Supplementary file [file media-2.pdf]

# Metabolon Metabolite Data QC Report

L.J.Corbin

31/03/2022

## Data overview

Number of samples in OrigScale file: 574

Number of features in OrigScale file: 1276

## Power exploration for case/control analysis

Estimated power at a range of standardized effect sizes

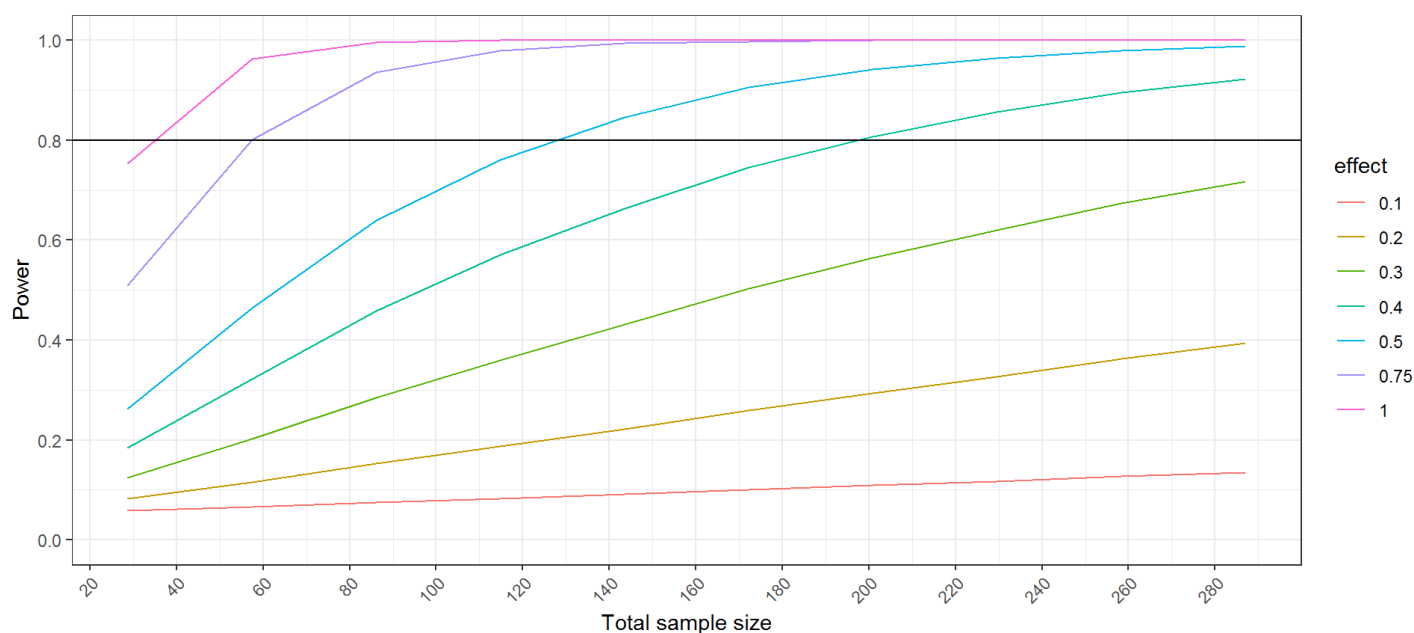

The minimum sample size required for achieving 80% power assuming a standardised effect size of 1, and an equal split between intervention/control groups, is: 34

## Power exploration for continuous outcome analysis

Estimated power at a range of standardized effect sizes

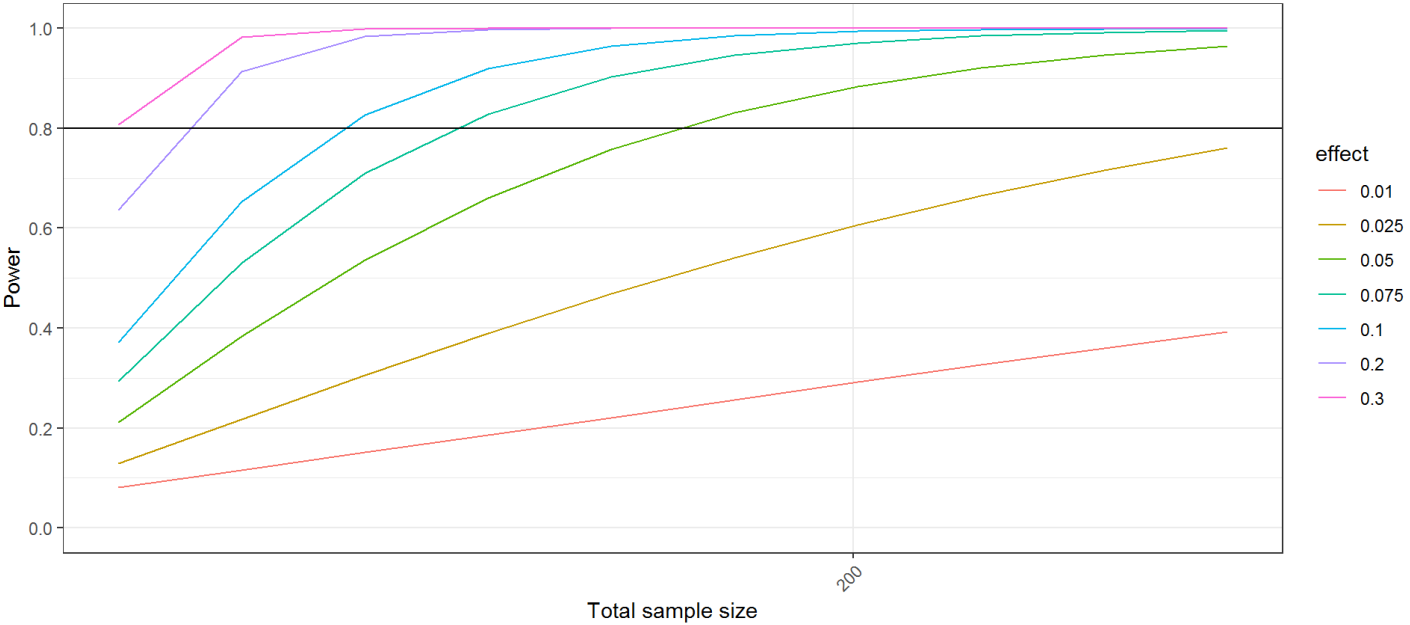

Summarise missingness (pre filtering)

```
[1] "Summary of sample missingness:"
```

| Min.   | 1st Qu. | Median | Mean   | 3rd Qu. | Max.   |
|--------|---------|--------|--------|---------|--------|
| 0.1183 | 0.1530  | 0.1677 | 0.1706 | 0.1850  | 0.2625 |

```
[1] "Summary of feature missingness:"
```

| Min.   | 1st Qu. | Median | Mean   | 3rd Qu. | Max.   |
|--------|---------|--------|--------|---------|--------|
| 0.0000 | 0.0000  | 0.0122 | 0.1706 | 0.2404  | 0.9983 |

**OrigScale - Distribution of by sample missingness**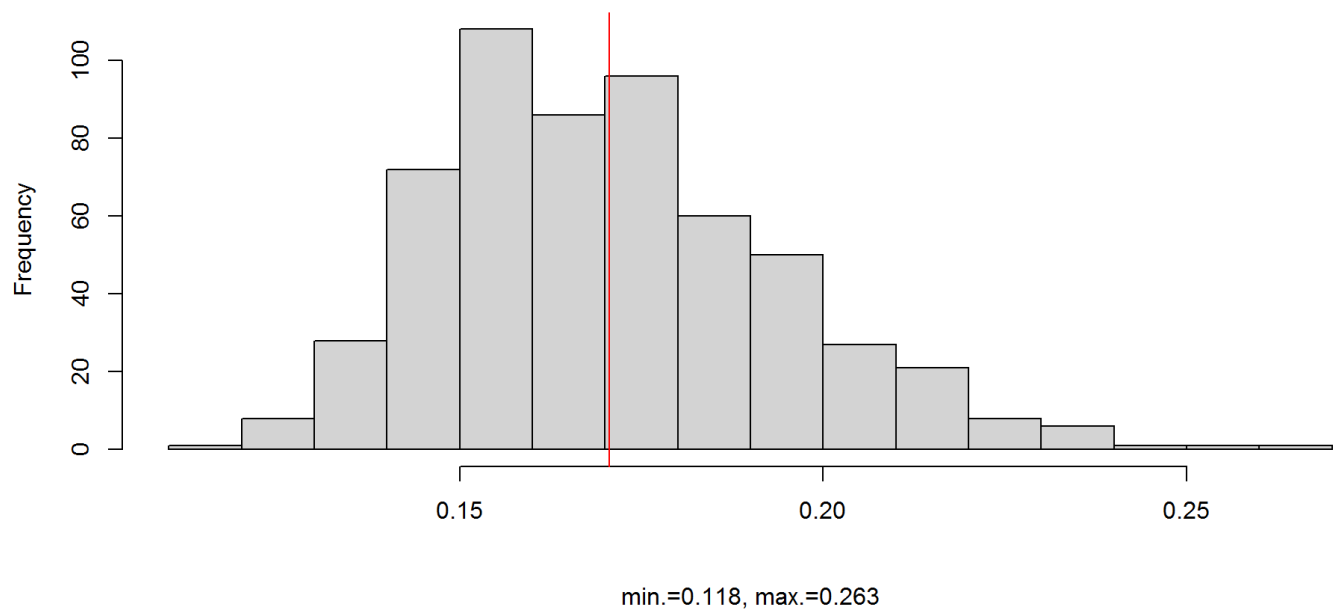**OrigScale - Distribution of by feature missingness**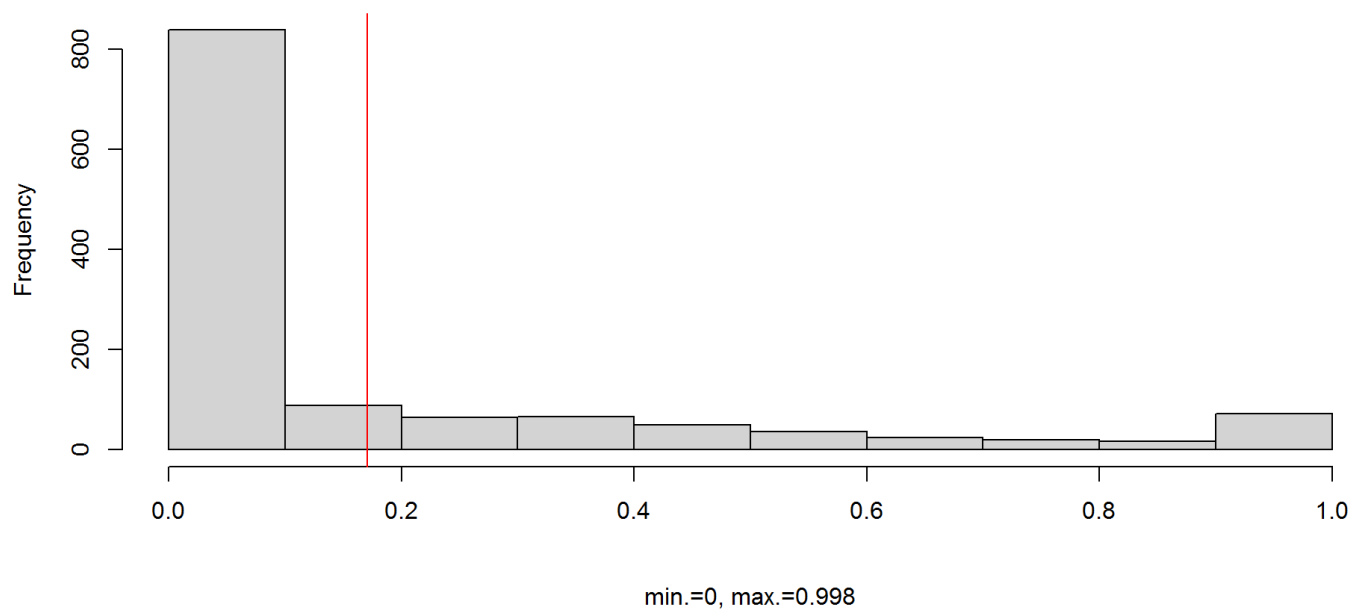

There are 440 features with no data missing.

**Example sample numbers at different missingness rates**

If feature has 10% missingness, data is available for: 516.6 samples.

If feature has 20% missingness, data is available for: 459.2 samples.

If feature has 30% missingness, data is available for: 401.8 samples.

If feature has 40% missingness, data is available for: 344.4 samples.

If feature has 50% missingness, data is available for: 287 samples.

**Summarise outliers (pre filtering)**

**Outliers are defined both as values greater than or less than 5SD from the mean and as values outside the 1st/99th percentile.**

```
[1] "Summary of SD outliers by sample (pre filtering):"
```

| Min.  | 1st Qu. | Median | Mean  | 3rd Qu. | Max.   |
|-------|---------|--------|-------|---------|--------|
| 0.000 | 0.000   | 2.000  | 3.352 | 4.000   | 35.000 |

```
[1] "Summary of SD outliers by feature (pre filtering):"
```

| Min.  | 1st Qu. | Median | Mean  | 3rd Qu. | Max.  |
|-------|---------|--------|-------|---------|-------|
| 0.000 | 0.000   | 1.000  | 1.508 | 2.000   | 8.000 |

```
[1] "Summary of percentile outliers by sample (pre filtering):"
```

| Min. | 1st Qu. | Median | Mean  | 3rd Qu. | Max.   |
|------|---------|--------|-------|---------|--------|
| 2.00 | 12.00   | 18.00  | 22.94 | 28.00   | 102.00 |

```
[1] "Summary of percentile outliers by feature (pre filtering):"
```

| Min. | 1st Qu. | Median | Mean  | 3rd Qu. | Max.  |
|------|---------|--------|-------|---------|-------|
| 0.00 | 10.00   | 12.00  | 10.32 | 12.00   | 12.00 |

## Apply missingness thresholds to data and re-summarise

Sample missingness applied using all features except those classified as xenobiotics.

Samples excluded if more than 20% of features are missing.

Features excluded if they are measured in less than 5 samples.

Number of sample exclusions based on >20% missingness: 0

Sample missingness is calculated after exclusion of 203 xenobiotics, leaving 1073 features. Number of feature exclusions based on >0.9912892 missingness: 22

```
[1] "Summary of sample missingness after cleaning:"
```

| Min.   | 1st Qu. | Median | Mean   | 3rd Qu. | Max.   |
|--------|---------|--------|--------|---------|--------|
| 0.1029 | 0.1382  | 0.1531 | 0.1561 | 0.1707  | 0.2496 |

```
[1] "Summary of feature missingness after cleaning:"
```

| Min.    | 1st Qu. | Median  | Mean    | 3rd Qu. | Max.    |
|---------|---------|---------|---------|---------|---------|
| 0.00000 | 0.00000 | 0.01045 | 0.15612 | 0.21646 | 0.99129 |

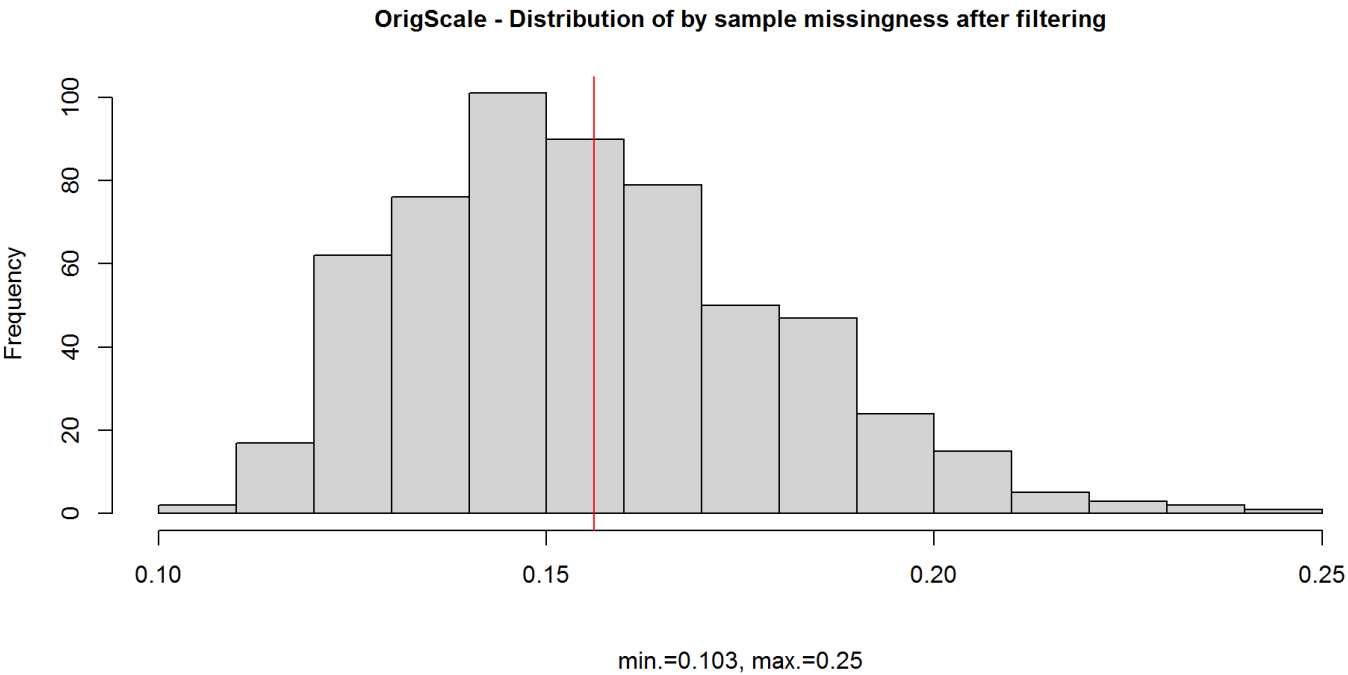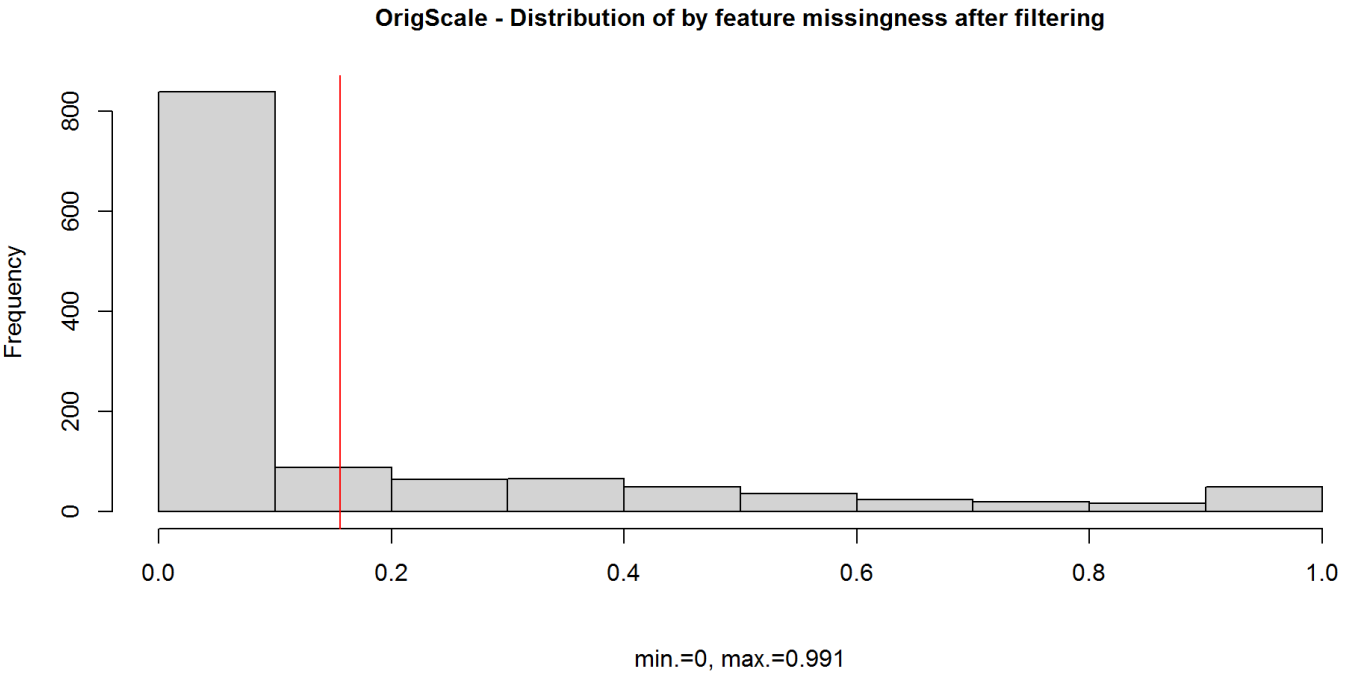

Total peak area assessment (by sample) (based on filtered OrigScale data)

[1] "Summary of total peak area:"

| Min.      | 1st Qu.   | Median    | Mean      | 3rd Qu.   | Max.      |
|-----------|-----------|-----------|-----------|-----------|-----------|
| 3.142e+10 | 4.496e+10 | 4.923e+10 | 4.937e+10 | 5.348e+10 | 8.158e+10 |

### OrigScale - Distribution of total peak area (across samples)

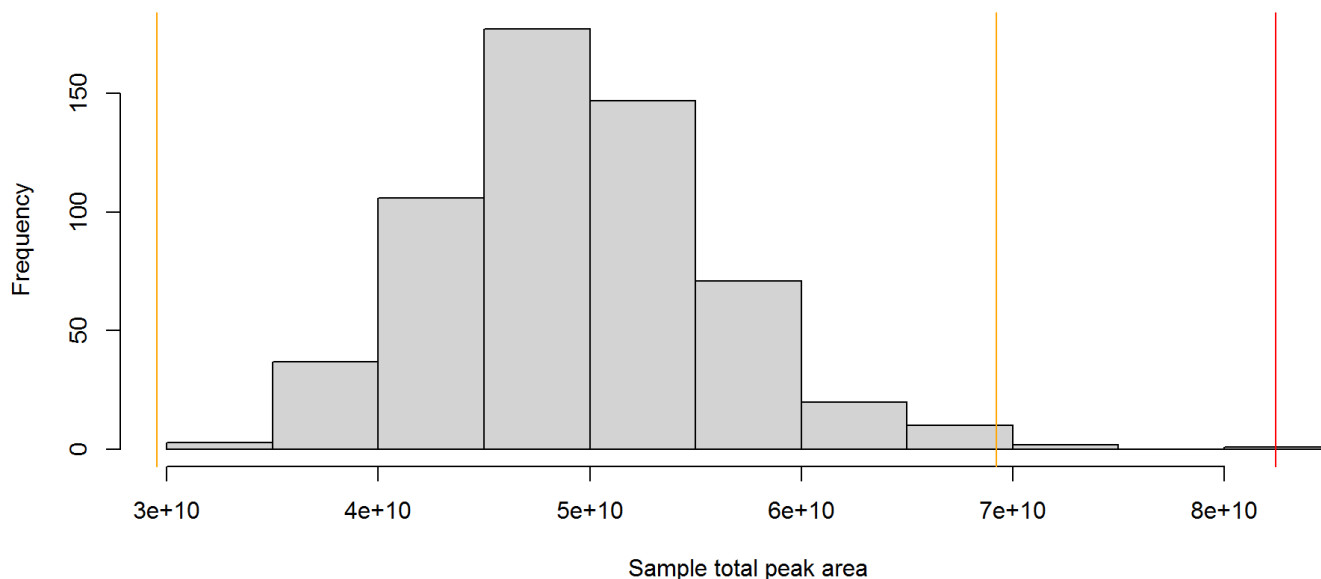

Number of sample exclusions based on total peak area (+/- 3sd from the mean): 5

Number of sample exclusions based on total peak area (+/- 5sd from the mean) (current criteria): 0

## Plot principal components - check for sample outliers

### Identify independent features based on Spearman's correlation

Spearman Cluster Dendrogram with cut height of 0.20

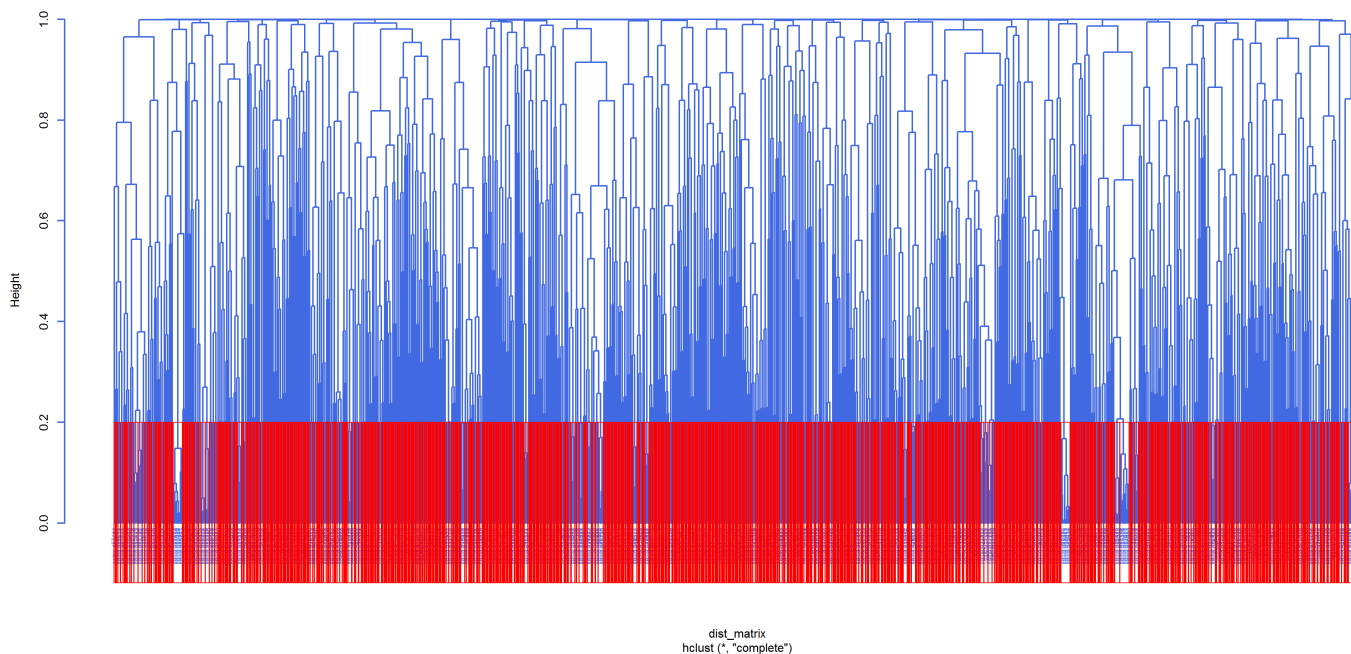

Total number of features with <20% missingness (used for identifying independent features): 927

Number of independent features used for PCA (based on a tree cut height of 0.20): 775

## Generate PCs

[1] "Round 1 PCA - variance explained:"

ppca calculated PCA  
Importance of component(s):

|               | PC1     | PC2    | PC3     | PC4     | PC5     | PC6     | PC7    | PC8     |
|---------------|---------|--------|---------|---------|---------|---------|--------|---------|
| R2            | 0.06855 | 0.0543 | 0.04121 | 0.03791 | 0.03359 | 0.02894 | 0.0236 | 0.02123 |
| Cumulative R2 | 0.06855 | 0.1228 | 0.16405 | 0.20196 | 0.23555 | 0.26450 | 0.2881 | 0.30933 |

  

|               | PC9     | PC10    | PC11    | PC12    | PC13    | PC14   | PC15    | PC16    |
|---------------|---------|---------|---------|---------|---------|--------|---------|---------|
| R2            | 0.01976 | 0.01848 | 0.01561 | 0.01515 | 0.01417 | 0.0121 | 0.01178 | 0.01108 |
| Cumulative R2 | 0.32909 | 0.34757 | 0.36318 | 0.37833 | 0.39249 | 0.4046 | 0.41638 | 0.42746 |

  

|               | PC17    | PC18    | PC19    | PC20     |
|---------------|---------|---------|---------|----------|
| R2            | 0.01068 | 0.01018 | 0.00987 | 0.009634 |
| Cumulative R2 | 0.43815 | 0.44833 | 0.45820 | 0.467837 |

| PC1  | PC2  | PC3  | PC4  | PC5  | PC6  | PC7  | PC8  | PC9  | PC10 | PC11 | PC12 | PC13 | PC14 | PC15 | PC16 |
|------|------|------|------|------|------|------|------|------|------|------|------|------|------|------|------|
| 0.07 | 0.05 | 0.04 | 0.04 | 0.03 | 0.03 | 0.02 | 0.02 | 0.02 | 0.02 | 0.02 | 0.02 | 0.01 | 0.01 | 0.01 | 0.01 |

  

| PC17 | PC18 | PC19 | PC20 |
|------|------|------|------|
| 0.01 | 0.01 | 0.01 | 0.01 |

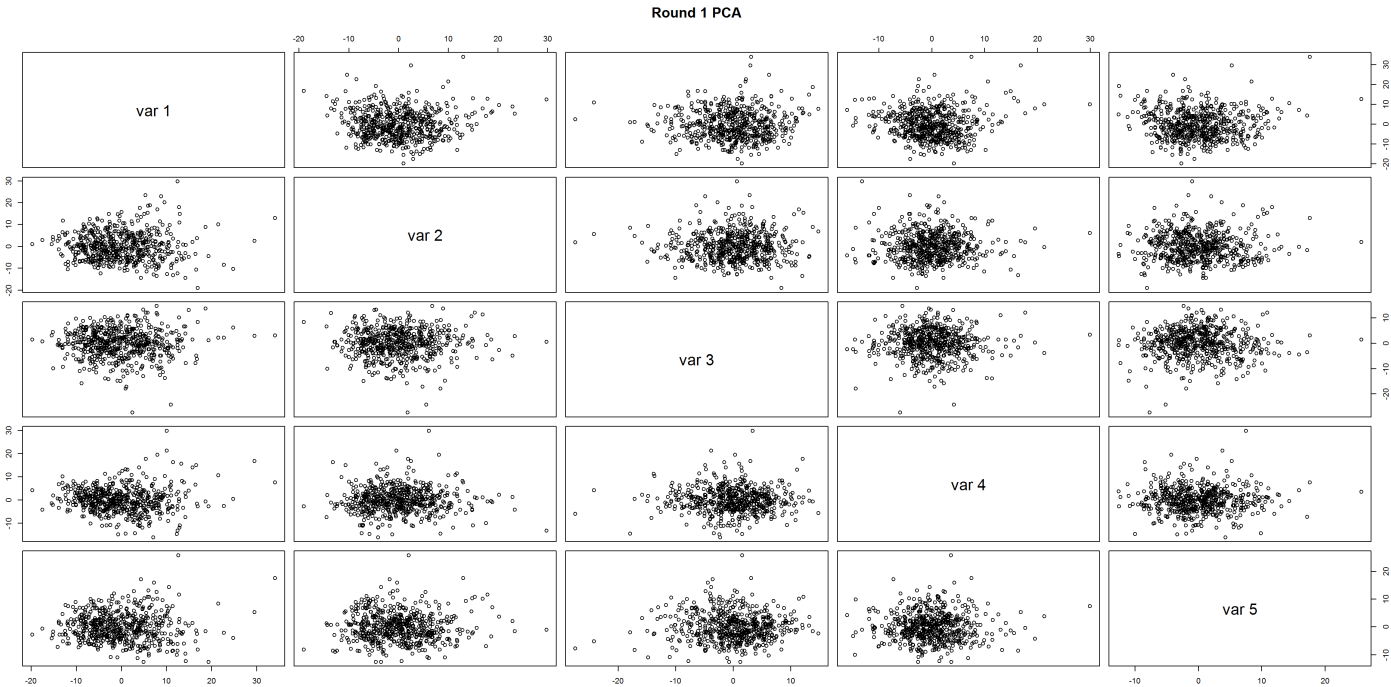

PCA Round 1 - Number of samples to exclude based on PC1 (+/- 5sd from the mean): 0  
PCA Round 1 - Number of samples to exclude based on PC2 (+/- 5sd from the mean): 0

[1] "No PCA outliers identified. Second round of PCA not needed"

PCA Round 2 - Number of samples to exclude based on PC1 (+/- 5sd from the mean): 0  
PCA Round 2 - Number of samples to exclude based on PC2 (+/- 5sd from the mean): 0

# Prepare QC'd datasets

Warning in orig\_sample\$client.identifier == extra\_fails: longer object length is not a multiple of shorter object length

No. of samples excluded due to failing Nightingale QC: 3

# Data overview post QC

The QC'd data files contain 571 samples and 1254 features.

## Check distributions (based on cleaned OrigScale data)

OrigScale - Least normal distributions

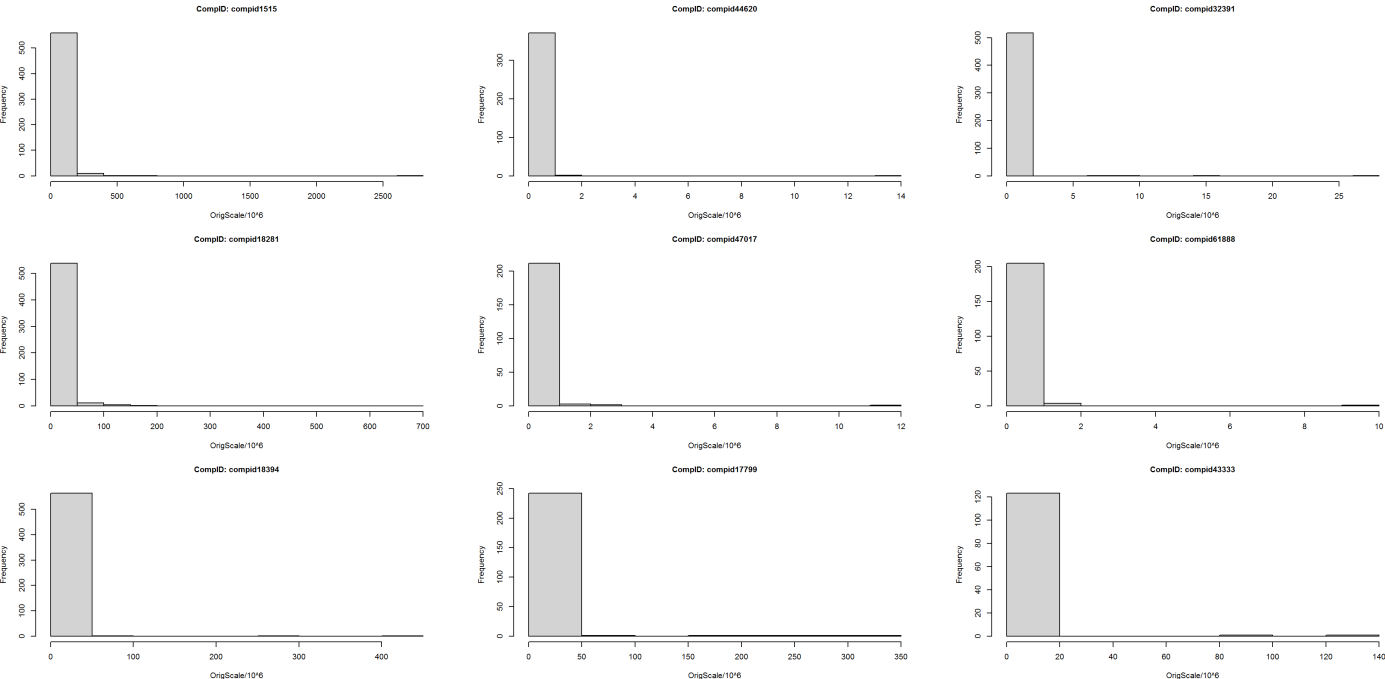

OrigScale - Most normal distributions

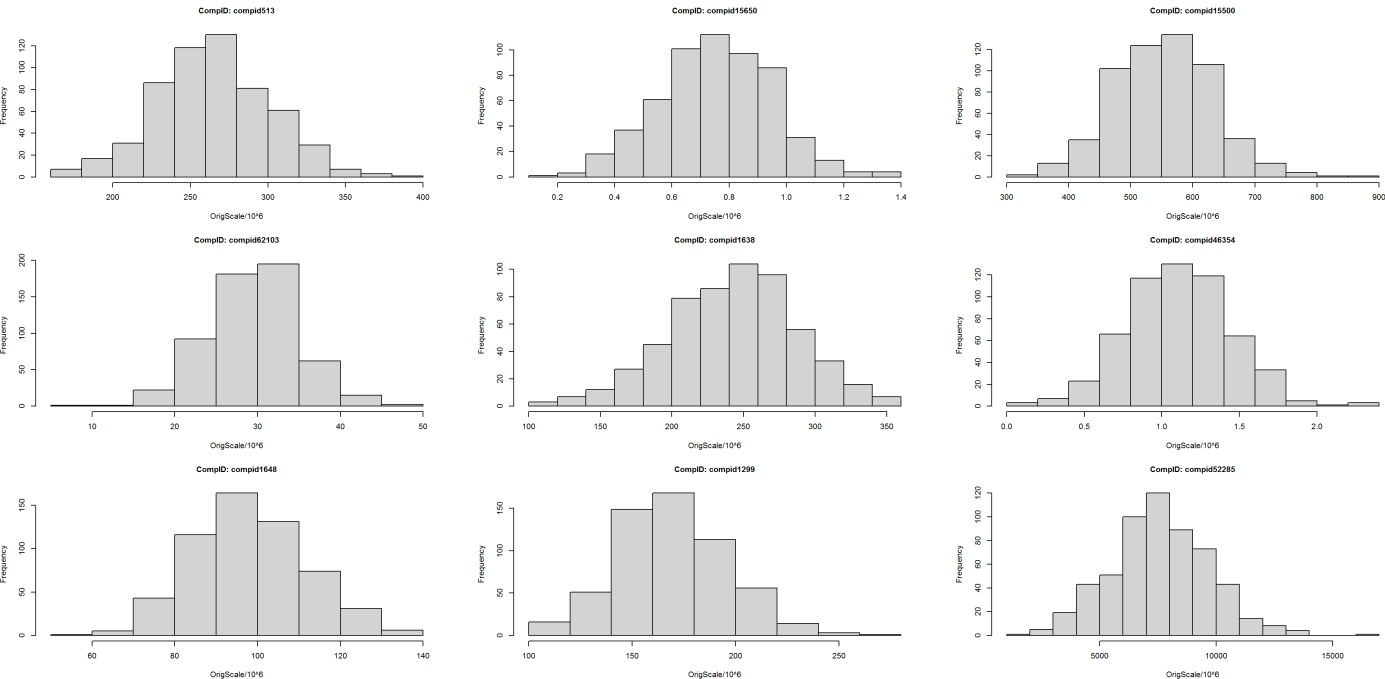

Proportion of features with a normal distribution ( $w>0.95$ ): 0.1810207  
Proportion of features with a normal distribution ( $p>0.01$ ): 0.0199362

## Summarise missingness (post QC)

```
[1] "Summary of sample missingness:"
```



| Min.   | 1st Qu. | Median | Mean   | 3rd Qu. | Max.   |
|--------|---------|--------|--------|---------|--------|
| 0.1029 | 0.1380  | 0.1531 | 0.1561 | 0.1707  | 0.2496 |

[1] "Summary of feature missingness:"

| Min.    | 1st Qu. | Median  | Mean    | 3rd Qu. | Max.    |
|---------|---------|---------|---------|---------|---------|
| 0.00000 | 0.00000 | 0.01051 | 0.15610 | 0.21629 | 0.99124 |

**OrigScale - Distribution of by sample missingness after QC**

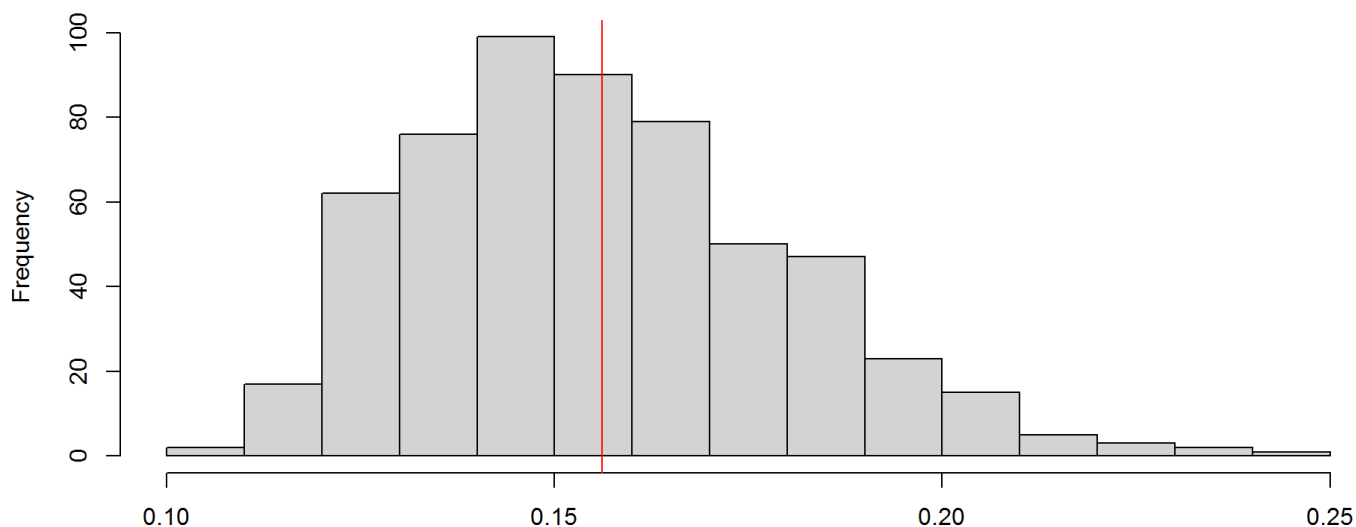

**OrigScale - Distribution of by feature missingness after QC**

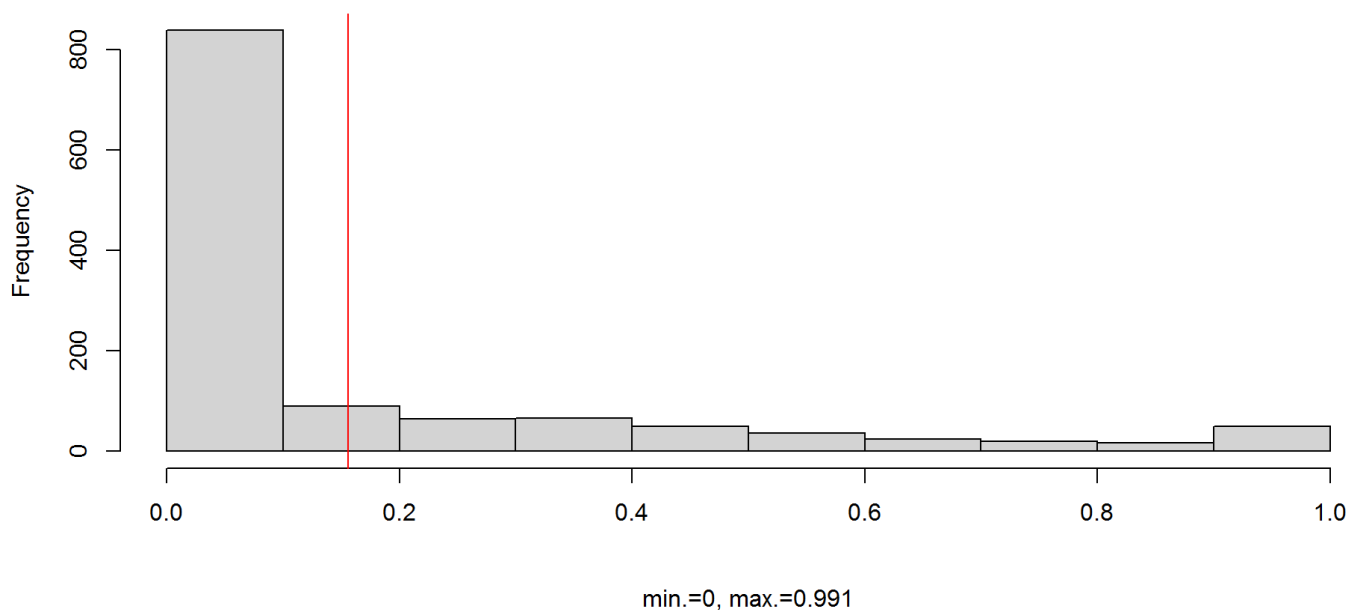

## Summarise outliers (post QC)

**Outliers are defined both as values greater than or less than 5SD from the mean and as values outside the 1st/99th percentile.**

```
[1] "Summary of SD outliers by sample (post filtering):"
```

| Min.  | 1st Qu. | Median | Mean  | 3rd Qu. | Max.   |
|-------|---------|--------|-------|---------|--------|
| 0.000 | 0.000   | 2.000  | 3.324 | 4.000   | 35.000 |

```
[1] "Summary of SD outliers by feature (post filtering):"
```

| Min.  | 1st Qu. | Median | Mean  | 3rd Qu. | Max.  |
|-------|---------|--------|-------|---------|-------|
| 0.000 | 0.000   | 1.000  | 1.514 | 2.000   | 8.000 |

```
[1] "Summary of percentile outliers by sample (post QC):"
```

| Min. | 1st Qu. | Median | Mean  | 3rd Qu. | Max.   |
|------|---------|--------|-------|---------|--------|
| 2.00 | 12.00   | 19.00  | 22.97 | 28.00   | 102.00 |

```
[1] "Summary of percentile outliers by feature (postQC):"
```

| Min. | 1st Qu. | Median | Mean  | 3rd Qu. | Max.  |
|------|---------|--------|-------|---------|-------|
| 2.00 | 10.00   | 12.00  | 10.46 | 12.00   | 12.00 |

```
sessionInfo()
```

```
## R version 4.0.2 (2020-06-22)
## Platform: x86_64-w64-mingw32/x64 (64-bit)
## Running under: Windows Server 2012 R2 x64 (build 9600)
##
## Matrix products: default
##
## locale:
## [1] LC_COLLATE=English_United Kingdom.1252
## [2] LC_CTYPE=English_United Kingdom.1252
## [3] LC_MONETARY=English_United Kingdom.1252
## [4] LC_NUMERIC=C
## [5] LC_TIME=English_United Kingdom.1252
##
## attached base packages:
## [1] parallel stats graphics grDevices utils datasets methods
## [8] base
##
## other attached packages:
## [1] pcaMethods_1.80.0 Biobase_2.48.0 BiocGenerics_0.34.0
## [4] psych_2.0.7 ggplot2_3.3.5 data.table_1.14.2
## [7] pwr_1.3-0 knitr_1.36 dplyr_1.0.7
##
## loaded via a namespace (and not attached):
## [1] Rcpp_1.0.7 highr_0.9 pillar_1.6.4 compiler_4.0.2
## [5] jquerylib_0.1.4 tools_4.0.2 digest_0.6.28 nlme_3.1-149
## [9] lattice_0.20-41 evaluate_0.14 lifecycle_1.0.1 tibble_3.1.5
## [13] gtable_0.3.0 pkgconfig_2.0.3 rlang_0.4.11 yaml_2.2.1
## [17] xfun_0.26 fastmap_1.1.0 withr_2.4.2 stringr_1.4.0
## [21] generics_0.1.0 vctrs_0.3.8 grid_4.0.2 tidyselect_1.1.1
## [25] glue_1.4.2 R6_2.5.1 fansi_0.5.0 rmarkdown_2.11
## [29] farver_2.1.0 purrr_0.3.4 magrittr_2.0.1 scales_1.1.1
## [33] ellipsis_0.3.2 htmltools_0.5.2 mnormt_2.0.1 colorspace_2.0-2
## [37] utf8_1.2.2 stringi_1.7.5 munsell_0.5.0 tmvnsim_1.0-2
## [41] crayon_1.4.1
```
